# Supplementary material
Source: PubMed Central journal article supplement (PMC2064871)
Supplement: NIHMS25585-supplement-02.pdf [file NIHMS25585-supplement-02.pdf]

**Supplementary Table 1.** List of animals and their sequence data cited for the generation of a physical map.

| Gene                                       | Identification number           | Gene                                                  | Identification number              |
|--------------------------------------------|---------------------------------|-------------------------------------------------------|------------------------------------|
| <b>A. Human (<i>Homo sapiens</i>)</b>      |                                 | <i>drc1a</i>                                          | CN510162                           |
| <i>ADAM19</i>                              | BAA32351                        | <i>mcm6</i>                                           | XM_689678                          |
| <i>CASP8</i>                               | NM_001228                       | <i>mpp4</i>                                           | XM_679434                          |
| <i>CASP10</i>                              | NM_001230                       | <i>osbpl6</i>                                         | ENSDART00000062954 <sup>#</sup>    |
| <i>CFLAR</i>                               | NM_003879                       | <i>orc2</i>                                           | NM_201175                          |
| <i>DRC1A</i>                               | AB030241                        | <b>E. Puffer fish (<i>Tetraodon nigroviridis</i>)</b> |                                    |
| <i>MCM6</i>                                | NM_005915                       | <i>adam19</i>                                         | GIDT00005804001*                   |
| <i>MPP4</i>                                | AF316032                        | <i>casp8</i>                                          | GIDT00013441001*                   |
| <i>ORC2</i>                                | NM_006190                       | <i>casp10-like</i>                                    | GIDT00023376001*                   |
| <b>B. Chicken (<i>Gallus gallus</i>)</b>   |                                 | <i>cflar</i>                                          | GIDT00022814001*                   |
| <i>casp8</i>                               | NM_204592                       | <i>drc1a</i>                                          | GIDT00022815001*                   |
| <i>casp8/10</i>                            | DQ010055                        | <i>mcm6</i>                                           | GIDT00013443001*                   |
| <i>casp10</i>                              | XM_421936                       | <i>mpp4</i>                                           | GIDT00013416001*                   |
| <i>cflar</i>                               | XM_421935                       | <i>osbpl6</i>                                         | GIDT00023375001*                   |
| <b>C. Frog (<i>Xenopus tropicalis</i>)</b> |                                 | <i>orc2</i>                                           | GIDT00013446001*                   |
| <i>casp8</i>                               | e_gw1.218.87.1 <sup>^</sup>     | <b>F. Fugu (<i>Takifugu rubripes</i>)</b>             |                                    |
| <i>casp8/10</i>                            | DT426909                        | <i>adam19</i>                                         | NEWSINFRUG00000124740 <sup>#</sup> |
| <i>casp10</i>                              | BC089646                        | <i>card-casp8</i>                                     | NEWSINFRUG00000159688 <sup>#</sup> |
| <i>cflar</i>                               | e_gw1.218.86.1 <sup>^</sup>     | <i>casp8</i>                                          | NEWSINFRUG00000160163 <sup>#</sup> |
| <b>D. Zebrafish (<i>Danio rerio</i>)</b>   |                                 | <i>casp10-like</i>                                    | NEWSINFRUG00000161667 <sup>#</sup> |
| <i>adam19</i>                              | ENSDART00000062916 <sup>#</sup> | <i>cflar</i>                                          | NEWSINFRUG00000137039 <sup>#</sup> |
| <i>card-casp8</i>                          | CT693310/AL728411               | <i>drc1a</i>                                          | NEWSINFRUG00000137040 <sup>#</sup> |
| <i>casp8</i>                               | NM_131510                       | <i>mcm6</i>                                           | NEWSINFRUG00000130218 <sup>#</sup> |
| <i>casp10-like</i>                         | ENSDART00000014766 <sup>#</sup> | <i>mpp4</i>                                           | NEWSINFRUG00000133071 <sup>#</sup> |
| <i>cflar</i>                               | NM_194399                       | <i>osbpl6</i>                                         | NEWSINFRUG00000160576 <sup>#</sup> |
|                                            |                                 | <i>orc2</i>                                           | NEWSINFRUG00000130241 <sup>#</sup> |

Sequence data indicated by asterisks (\*), circumflexes (^) and sharps (#) were published in the Genoscope, JGI and Ensembl genome databases, respectively and the other sequence data were published in the GenBank database. Abbreviated genes: *ADAM19*, a disintegrin and metalloproteinase domain 19; *card-casp8*, caspase-8-like protein with a CARD motif; *CASP8*, caspase-8; *CASP8/10*, caspase-8/-10 homolog; *CASP10*, caspase-10; *casp10-like*, caspase-10-like protein; *CFLAR*, Casp8 and FADD-like apoptosis regulator; *DRC1A*, down-regulated by CTNNB1 protein A; *MCM6*, minichromosome maintenance protein 6; *MPP4*, MAGUK p55 subfamily member 4; *osbpl6*, oxysterol-binding protein-like protein 6; *ORC2*, origin recognition complex, subunit 2.
