# Supplementary material
Source: PubMed Central journal article supplement (PMC2064871)
Supplement: NIHMS25585-supplement-06.pdf [file NIHMS25585-supplement-06.pdf]

Supplementary Fig. 1 (Continued)

B

|        |                                                               |     |
|--------|---------------------------------------------------------------|-----|
| zCasp8 | -----MDPQ-IFHEIDENLISGDVDOLKFLCLDFIPKRRLESVTDAKDLIL           | 45  |
| hCASP8 | -----MDFSRNLYDIGEQLDSEDLASLKFLSLDYIPQRKQEPKDALMLFQ            | 46  |
| mCasp8 | -----MDFQSCLYAIAEELGSEDLAALKFLCLDYIPHKQETTEDAQKFLF            | 46  |
| xCasp8 | MSDLLSSTVDAMNLA DMNKLLEISEDLDKTETLAMIIFLCEKRVTAQEKENIKDAKTLFL | 60  |
| zCasp8 | RLDEOGLLED--ELLFPELLIATGRIDLLLEILKKS-KEEVERNLLRCDNSRKGVSAYRKM | 102 |
| hCASP8 | RLQEKRMLEESNLSFLKELLFRINRDLDLITYLNTRKEEMERELOTPGR--AQISAYRVM  | 104 |
| mCasp8 | RLREKGMLEECNLSFLKELLEHSRWDLVNFELDCNREEMVRELRDPDN--AQISPYRVM   | 104 |
| xCasp8 | CLKKKDLICYNLDSFLKELLVIRIGRNDLLRGLGVRTTEIKRILEWS----PQISPYRIL  | 116 |
| zCasp8 | LLKISEDMTEENFRAAKFLLD--LPRAKLGRSTSFLDALIEMEKQORLGPNDLDELYRIL  | 160 |
| hCASP8 | LYQISEEVSRSELRSFKFLLOEETSKCKLDDMNLLDIFIEMEKRVILGEGKLDILKRVK   | 164 |
| mCasp8 | LFKISEEVSELELRSEFKFLNNEIPKCKLEDDLSLEIFVEMEKRTMLAENNETLKSIC    | 164 |
| xCasp8 | LYDLSQGLSKKEVEDLKVLLDLSTAKT---ENASILEIFLELEKVGKLPDDLQKDKHDL   | 173 |
| zCasp8 | EKCD-KOLAVMIERFRNQSHRDOE OGGRLPLEEVF-----LNNPVSETMERERR       | 207 |
| hCASP8 | AQIN-KSLLKIINDYEEFSKERSSLEGSPEFS-----NGEELCGVMTISDS           | 211 |
| mCasp8 | QOVN-KSLLGKIEDYERSSTERRMSLEGREELPPSV-----LDEMSELKMAELCDS      | 213 |
| xCasp8 | ETIGCKNLSRNIEDYERISEADNHRPENLPDLFEKISVQEEQVNCTAQEPFNCEQRTPOP  | 233 |
| zCasp8 | -RNSAGAITTDAETPLNPNFYILTORPLGYCLIIINNYNFKS-----TNLLKRTIGT     | 260 |
| hCASP8 | PREQ-----DSES-OTLDKVYQMKSKPRGYCLIIINHNFAKAREKVPKLIHSIRDRNGT   | 263 |
| mCasp8 | PREQ-----DSES-RTSDKVYQMKKPRGYCLIIINHDFSKAREDITQLRKMKDRKGT     | 265 |
| xCasp8 | ETESDYCQP--QQHS-HMNLETYLEKNPHEWCVVINNYDFKEARSQDCKYT---DREGT   | 287 |
| zCasp8 | DMDKDRIAKLFSRMHFQIEVRNDLEAWATKDEIKOFANRNHASMGAFVCCILSHGKGTV   | 320 |
| hCASP8 | HLDACALITTFEELHFEIKPHDDCTVECIYEILKIYQLMDHSNMDCFICILSHGDKGII   | 323 |
| mCasp8 | DCDKKALSKTFKELHFEIVSYDDCTANEIHEILEGYQSADHKNKDCFICILSHGDKGVV   | 325 |
| xCasp8 | AKDAEETIRIFNARGYITTEHRDLTAANIQKTLFMYSKKDHAEKDSFVCFILSHGGVGTV  | 347 |
| zCasp8 | IGTDGKPVETREVTLPFAG--CRILASKPKLFFIQACQGDENQAGVWTS DGREDAPEEDE | 378 |
| hCASP8 | YGTDCQEPPTIYELTSQFTGLKCPSLAGPKVFFIQACQGDNYQKGPVETDSE---EQP    | 379 |
| mCasp8 | YGTDCKEASTYDLTSYFTGSKCPSLSGPKPIFFIQACQGSNFOKGVPEAGFE---QQNH   | 382 |
| xCasp8 | CCDGEVEVEIKRLTKYFNQOHCRLINKPKIFFIQACQKESHPK--VDMMD-----TS     | 400 |
| zCasp8 | KYEEDAGIIVLRKIPTEADFLIGMATVEHYLSYRHTKKGSI FIOELCKKMEELCPKKEDM | 438 |
| hCASP8 | YLEMDLSSPQTRYIPDEADFLIGMATVNNCVSYRNP AEGTWYIQSLCQSLRERCPRGDDI | 439 |
| mCasp8 | TLEVDSSS-HKNYIPDEADFLIGMATVKNCVSYRDPVNGTWYIQSLCQSLRERCPOGDDI  | 441 |
| xCasp8 | FYEPDANG---SHLPIEADFLTAFATVEDYTSLRHRENGSIYIQQLCKALTYTIN--QDL  | 455 |
| zCasp8 | LSILTKVNEVSKRILKGY----KOMPEPRYTLTKKLVLPID                     | 476 |
| hCASP8 | LITLITEVNYEVS NKDDK--KNMGKOMPQPTFTLRKKLVFPPD                  | 479 |
| mCasp8 | LSILTCVNYDVS NKDDR--RNKGKOMPQPTFTLRKKLVFPP-                   | 480 |
| xCasp8 | IDILLTSVNSDVANMLFRILWRKNVTQMPSEFKSELRKKLILPPPNAM              | 500 |
